# Supplementary material
Source: PubMed Central journal article supplement (PMC6052445)
Supplement: NIHMS939010-supplement-1.pdf [file NIHMS939010-supplement-1.pdf]

Table S1. Summary of Karyotyping Results

| Sample                                     | No. of samples | Premature Sister-chromatid Separation | Aneuploidy | Breaks/Gaps per cell |      |                    |         |
|--------------------------------------------|----------------|---------------------------------------|------------|----------------------|------|--------------------|---------|
|                                            |                |                                       |            | Average              | SD   | Ratio (vs Control) | P-value |
| Setd1a <sup>+/+</sup> ;CreER-TAM (Control) | 20             | 0%                                    | 0%         | 0.80                 | 1.11 | 1.0                |         |
| Setd1a <sup>+/+</sup> ;CreER+TAM           | 40             | 0%                                    | 0%         | 0.61                 | 1.02 | 0.8                | 0.5088  |
| Setd1a <sup>fl/fl</sup> ;CreER-TAM         | 20             | 0%                                    | 0%         | 0.70                 | 0.92 | 0.9                | 0.7578  |
| Setd1a <sup>fl/fl</sup> ;CreER+TAM         | 40             | 0%                                    | 0%         | 3.43                 | 2.68 | 4.3                | 0.0001  |
